# Supplementary material
Source: publisher figshare collection journal article supplement (https://future-science-group.figshare.com/ndownloader/files/30702995)
Supplement: Supplementary file 1 [file 30702995]

# Supplementary Table 2. Assessment of GvHD in transplanted mice – modified chronic sclerodermatous GvHD scoring protocol.

| **Criteria** | **Grade 0** | **Grade 1** | **Grade 2** | **Grade 3** | **Grade 4** |
| --- | --- | --- | --- | --- | --- |
| **Weight loss** | No weight loss | >0% to <5% | >5% to <10% | >10% to <15% | >15% |
| **Posture** | Normal | Mild hunched posture | Moderate hunched posture | Severe hunched posture | — |
| **Activity** | Normal | Slowed gait | Slowed gait; refusal to move when touched | Immobility when touched | — |
| **Fur texture** | Normal | Ruffled hair; small amount of hair loss | Hair loss in a single area <1 cm2 | Hair loss in a single area >1 cm2 | Complete hair loss or >1 cm2 area involved |
| **Skin integrity** | Normal | Red/irritated skin lesion | Skin flaking/peeling; single lesion | Scabbing or bleeding; single lesion | Scabbing or bleeding; multiple lesions |

GvHD: graft-versus-host disease.
